# Supplementary material for: Parallel bioreactor system for accessible and reproducible anaerobic culture
Source: PubMed Central journal article supplement (PMC8208757; doi:10.1099/acmi.0.000225), 2021-04-15
Supplement: acmi-3-0225-s001.pdf [file acmi-3-0225-s001.pdf]

## Supplemental Data

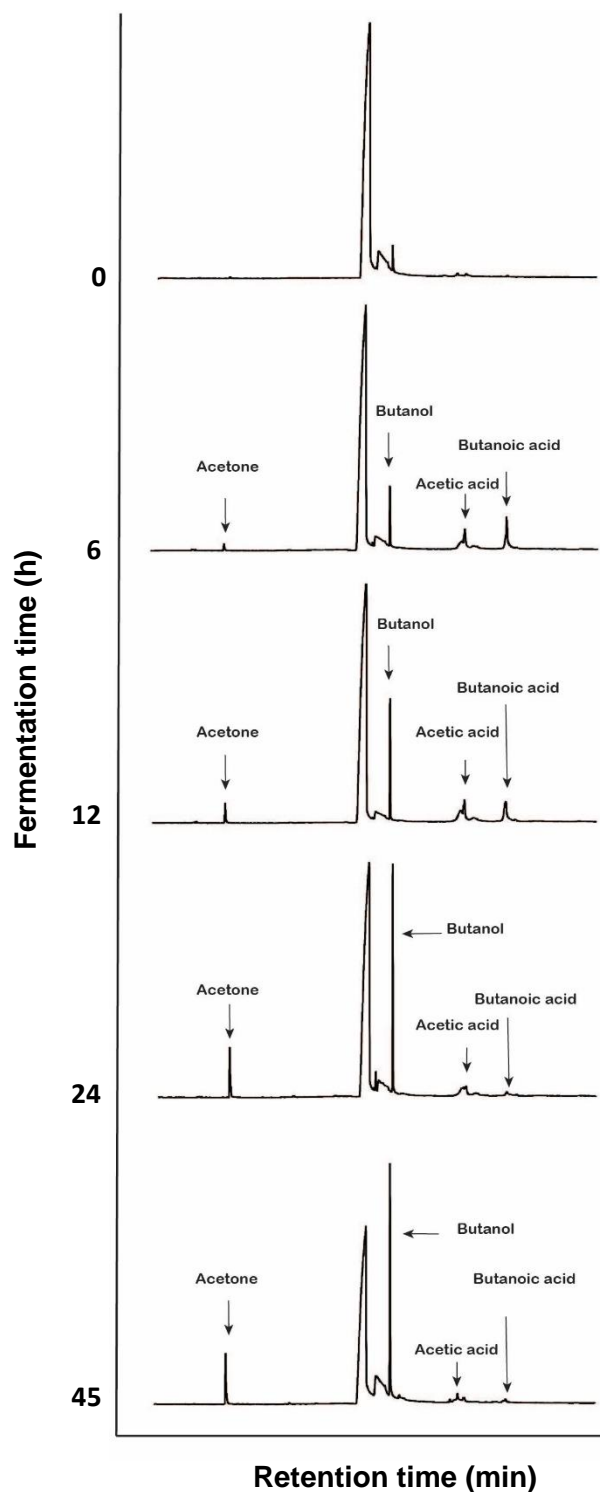

**Fig. S1.** GCMS Chromatographs from *C. saccharoperbutylacetonicum* N1-4(HMT) YETM  $40 \text{ g L}^{-1}$  batch fermentation for the identification of acetone and butanol as well as acetic acid and butanoic acid. 2 mL of cell culture was taken from cells growing in a batch fermentation and cells were removed via centrifugation. Sample supernatants were applied to the GCMS instrument and peak positions were identified using known standards.

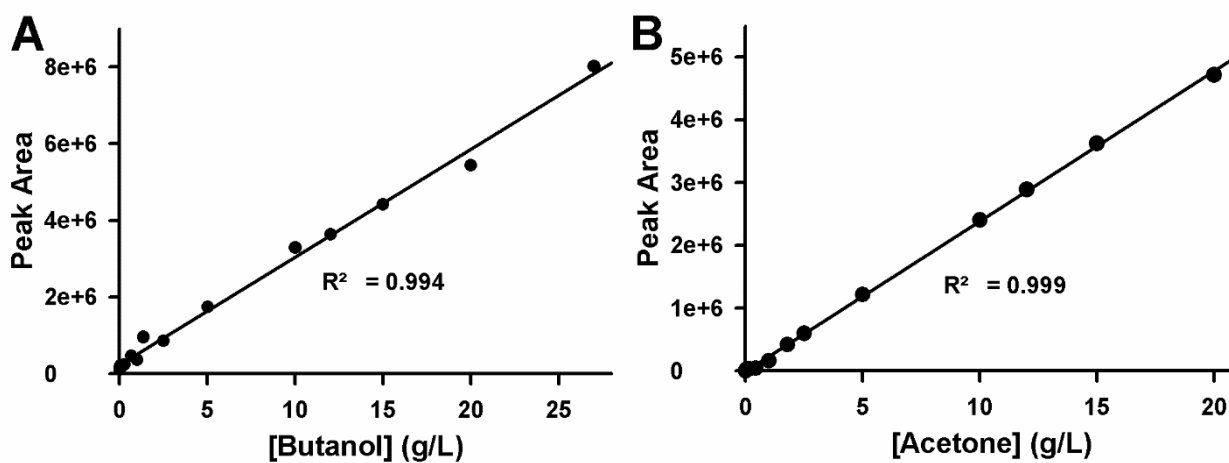

**Fig. S2.** GCMS standard curves. Solvents were diluted in water and were analysed via GCMS. A) Acetone. B) Butanol.

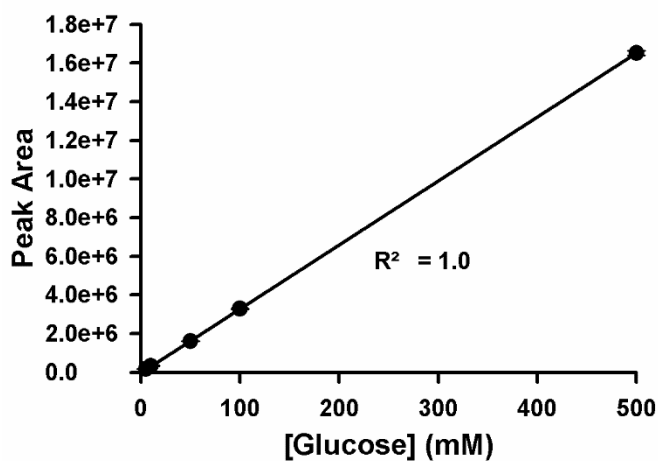

**Fig. S3.** Glucose standard curve. Glucose was quantitated via HPLC with refractive index detection as described in the Materials and Methods section. Measurements are averages of 3 repeats and error bars show standard deviations.

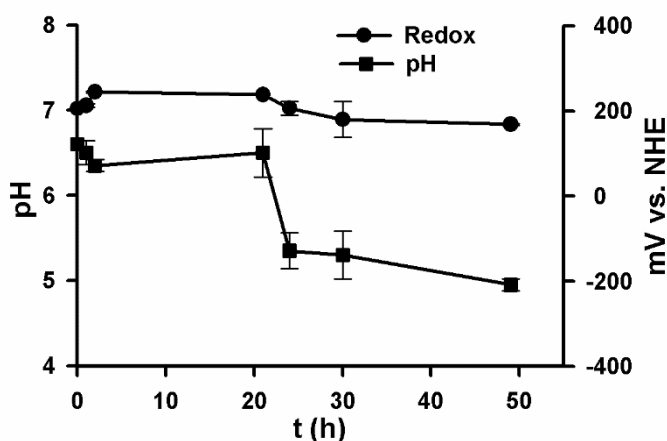

**Fig. S4.** Monitoring of growth parameters and metabolites for a *C. saccharoperbutylacetonicum* N1-4(HMT) batch fermentation on apple pomace. Output obtained for pH and redox (mV vs. Normal Hydrogen Electrode (NHE)). Final concentrations of butanol and acetone were measured as  $(0.6 \pm 0.3 \text{ gL}^{-1})$  and  $(0.4 \pm 0.03 \text{ gL}^{-1})$ , respectively. Fermentations were performed in duplicate and error bars show standard deviation.

| Fermenter                           | Feedstock                 | OD <sub>600</sub> | pH control     | Butanol (g/L)   | Acetone (g/L)  | Source     |
|-------------------------------------|---------------------------|-------------------|----------------|-----------------|----------------|------------|
| Current system                      | YETM + glucose            | 7.2               | MES            | $13.4 \pm 0.8$  | $4.9 \pm 0.5$  | This paper |
| Eppendorf BioFlo 120                | P2 medium                 | 15.3              | NaOH           | $15.3 \pm 0.1$  | $6.7 \pm 0.1$  | (21)       |
| Eppendorf BioFlo 120                | TGY + lactose             | 17.4              | NaOH           | $17.4 \pm 0.85$ | $7.6 \pm 0.53$ | (22)       |
| Multifors 5L bioreactor (Infors HT) | PGY + P2 glucose(40 g /L) | 2                 | Not controlled | 9.3             | 3.4            | (23)       |
| LiFlus GX; Biotron 5L               | CGM + glucose             | 10.0              | Ammonia        | 17.6            | 4.4            | (24)       |

**Table S1.** Comparison of current solvent yields with published ABE fermentation data. Cultures of solventogenic clostridia were grown in different growth media either in the current fermenters or a commercially available system. Abbreviations: CGM, clostridia growth medium; TGY, tryptone-glucose-yeast extract medium; YETM, yeast extract tryptone medium.
